# Supplementary material for: CRISPR/Cas9‐induced disruption of gene expression in mouse embryonic brain and single neural stem cells in vivo
Source: PubMed Central journal article supplement — EMBO Rep. 2016 Jan 12;17(3):338–48. doi: 10.15252/embr.201541715 (PMC4772980; doi:10.15252/embr.201541715), 2016-01-12
Supplement: EMBR-17-338-s004.pdf [file EMBR-17-338-s004.pdf]

Manuscript EMBO-2015-41715

**CRISPR/Cas9-induced disruption of gene expression in mouse embryonic brain and single neural stem cells in vivo**

Nereo Kalebic, Elena Taverna, Stefania Tavano, Fong Kuan Wong, Dana Suchold, Sylke Winkler, Wieland B. Huttner, Mihail Sarov

*Corresponding authors: Wieland B. Huttner, MPI for Molecular Cell Biology and Genetics  
Mihail Sarov, MPI for Molecular Cell Biology and Genetics*

---

**Review timeline:**

|                     |                   |
|---------------------|-------------------|
| Submission date:    | 10 August 2015    |
| Editorial Decision: | 08 September 2015 |
| Resubmission:       | 07 November 2015  |
| Editorial Decision: | 26 November 2015  |
| Revision received:  | 04 December 2015  |
| Accepted:           | 07 December 2015  |

---

Editor: Barbara Pauly/Martina Rembold

**Transaction Report:**

No Peer Review Process File is available with this article, as the authors have chosen not to make the review process public in this case.
